# Supplementary material
Source: publisher site journal article supplement (https://www.spandidos-publications.com/3962/downloadSupplementary)

Figure S1. Short tandem repeat profiles of NCC-DMM1-C1 cells and tumor tissue. The loci analyzed include D5S818, D13S317, D7S820, D16S539, vWA, TH01, TP0X, CSF1P0 and the sex chromosomal marker amelogenin. Results from the analysis of genomic DNA from (A) tumor tissue and (B) NCC-DMM1-C1 cells are presented.

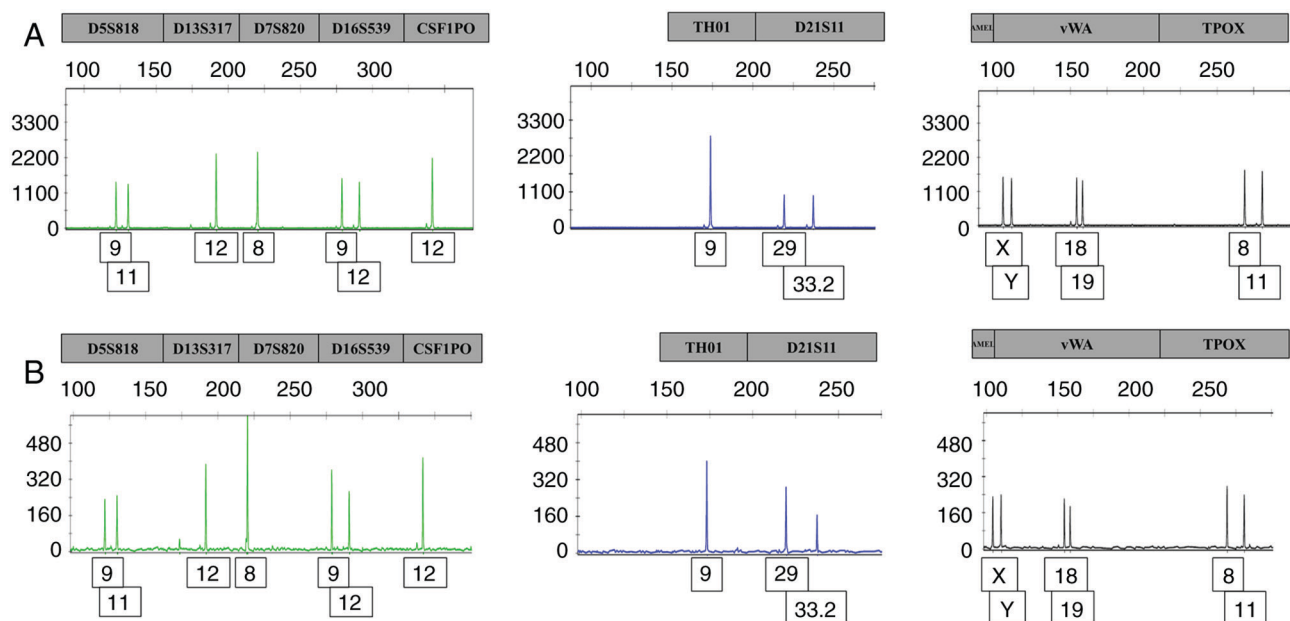

Figure S2. Invasion assay of NCC-DMM1-C1 cells. Invading NCC-DMM1-C1 cells on the membrane. (A and B) Images taken 24 h after seeding (A)  $1 \times 10^5$  and (B)  $2 \times 10^5$  cells. (C and D) Images taken 48 h after seeding (C)  $1 \times 10^5$  and (D)  $2 \times 10^5$  cells (scale bars,  $200 \mu\text{m}$ ).

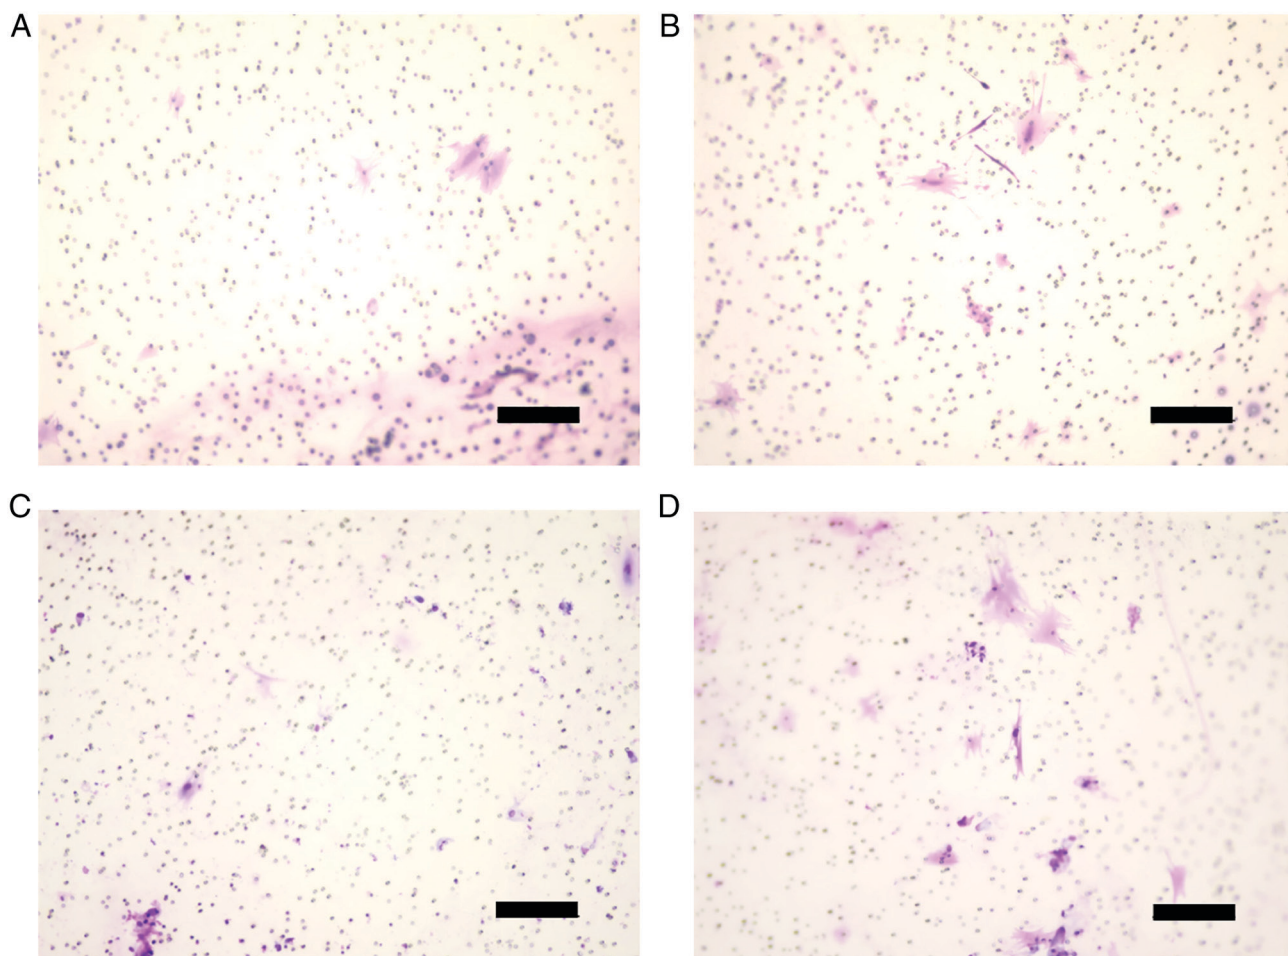

Figure S3. Effect of anti-cancer drugs on the proliferation of NCC-DMM1-C1 cells based on the CCK-8 assay. (A) Overall effect of anti-cancer agents on NCC-DMM1-C1 cell proliferation. Cells were treated with 10  $\mu$ M of each of the 213 anti-cancer agents for 72 h and the IC<sub>50</sub> values representing their inhibitory effects were calculated based on the growth curves from the CCK-8 assays. The results for cells treated with (B) cisplatin, (C) vandetanib, (D) mubritinib, (E) mitoxantrone, (F) canertinib, (G) pemetrexade, (H) vorinostat and (I) orantinib are provided. CCK-8, Cell Counting Kit-8. Data are presented as mean  $\pm$  standard deviations based on two biological replicates.

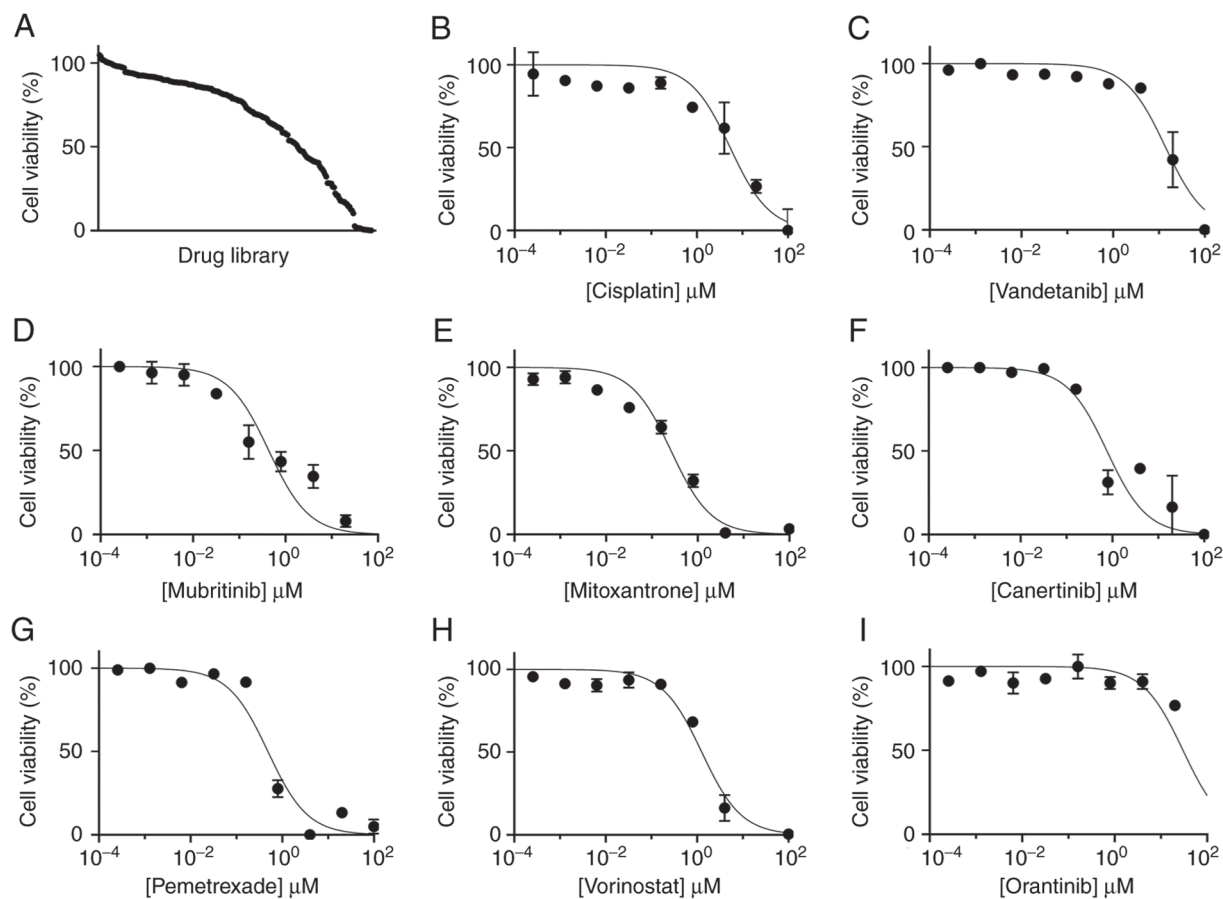

Supplement: Supplementary file 1 [file downloadSupplementary]
